# Supplementary material
Source: MDPI journal article supplement (https://www.mdpi.com/2071-1050/10/3/690)
Supplement: s1 [file s1]

## Sheet: 1st survey to partecipants
1st SURVEY TO PARTICIPANTS IN THE COMPOSTER-HENHOUSE PROJECT
#	Age	Gender	Number and age of family members									Pet	Have you had any experience with farm animals before this one?	What are the reasons for your participate in this project?	Do you participate in other activities of the park?	Do you participate in any other activity related to organic matter recycling?	What type of activity do you participate in?	Have you reduced the amount of organic waste you throw into the container?	How many days a week do you bring organic waste to the park?	What do you throw into the composter?													What do you like most about the CH?	How would you rate (1-19)?			Would you like to participate next year?
			0-3 years	4-10 years	11-20 years	21-30 years	31-40 years	41-50 years	51-60 years	61-70 years	Total									Meat	Fish	Fruits	Vegetables	Nut shells	Paper	Paper napkins/ Kitchen paper	Pruning	Eggshells	Coffee grounds/ Tea bags	Animal and fish bones	Ash/ Sawdust	Other		Organic orchard	Henhouse	Rest of the park
1	35	Female	1	1		1	1				4	no	no	Educational value for children	yes	no		yes	2	1	1	1	1	1				1	1	1			Hens and eggs	9	9	8	yes
2	49	Female				2		2			4	no	no		no	yes		yes	1		1		1										The contact with nature	8	8	8	yes
3	69	Female					1			1	2	yes	no	I saw the ad in the cafeteria	yes	no		yes	2	1	1	1	1	1				1		1			The animals	10	10	10	yes
4	51	Male				1		1	1		3	no	no	Recycling	yes	yes	Courses	no	2	1	1	1	1	1				1			1		Laying hens keeping and learning to compost	10	10	10	yes
5	37	Female					2				2	yes	yes	I saw the ad in the cafeteria	yes	no		yes	2	1		1	1				1	1				Bread	Hens and eggs	10	9.5	10	yes
6	34	Female					2				2	no	yes	Recycling. Eggs	yes	no		yes	1	1	1	1	1	1				1		1			Educating children, hens, and eggs	10	10	10	yes
7	38	Female		2			1	1			4	yes	yes		no	yes		yes		1	1		1							1			Doing stuff with my family	8	8	8	yes
8	41	Male		2				1			3	no	yes	Environmental awareness. Educational value	no	no		yes	2	1	1	1	1	1			1	1		1			Educational value. Eggs. Recycling	10	10	10	yes
9	55	Female	1	1			1		1		4	no	yes	When I was young I had a farm	yes	yes	Recycling course	yes	1			1	1	1			1	1	1	1	1		Recycling	10	10	10	yes
10	31	Male	1			1	1				3	no	no	Teaching my children to take care of animals	no	no		yes	1	1	1	1	1	1				1					Be part of a set and seeing that it's going well	10	10	10	yes
11	26	Female				3					3	no	yes	Environmental awareness. I'm volunteer at Agenda21	yes	yes	Vermicomposting course	yes	3	1	1	1	1	1			1	1	1	1		Organic tea bag	Not throwing organics into the container and rewarding the eggs for doing the work	6	5	10	yes
12	39	Female		2			1	1			4	no	no	Recycling. Eggs	no	no		yes	2 or 3	1	1	1	1	1			1	1		1			All. Coming here with my daughters	9	9	9	yes
13	36	Female					2				2	no	yes	Healthy eating	no	no		yes	1	1	1	1	1					1					Using organic waste to feed hens	8	10	10	yes
14	43	Female		2				1			3	no	no	I have two daughters who like animals	no	no		yes
15	12	Male	1	1				2			4	no	no	We liked the project idea	no	no		yes	2			1	1										The eggs	9	9	8	yes
16	38	Female		2			1				3	yes	no	Experience for children	no	no		yes	1 or 2	1	1	1	1	1				1					Educational value. Eggs	10	10	9	yes
17	34	Female									0	-	yes	Recycling. Eggs	yes	no		yes	1	1		1	1	1				1		1			Organic eggs	9	9	9	yes
18	37	Female			1		2				3	yes	no	Beautiful, educational and participative activity	no	yes	At school, composting	yes	1		1	1	1										The contact with the hens	10	9	10	yes
19	34	Female	1				1				2	no	no	It's a novel activity. Eggs	yes	no		yes	1	1	1	1	1	1				1		1			The result	9	9	9	yes
20	41	Female	1	2				2			5	yes	yes	Environmental awareness. I like the animals and the eggs. Involvement of children.	no	yes	Composting in the garden	yes	1	1	1	1	1	1				1		1			The implication of my daughters. On the day it's their turn, they eat eggs. It is becoming a tradition.	9	9	9	yes
21	43	Female			1	1		2			4	yes	yes	Interest in animals, nature and ecology	yes	no		yes	2	1	1	1	1	1				1	1	1	1		The contact with the hens. Waste prevention. The eggs.	8	9	9	yes
22	49	Female				2		1	1		4	yes	no	Curiosity. Environment	no	no		yes	3	1	1	1	1	1			1	1		1				9	9	10	yes
23	33	Male	1				2				3		no	Educational value for children	no	no		yes	2	1	1	1	1	1			1	1						9	9	9	yes

## Sheet: 2nd survey to partecipants
2nd SURVEY TO PARTICIPANTS IN THE COMPOSTER-HENHOUSE PROJECT
#	Age	Gender	Number and age of family members									Pet	How many days a week do you bring organic waste to the park?	Who takes the waste to the park? (gender)
			0-3 years	4-10 years	11-20 years	21-30 years	31-40 years	41-50 years	51-60 years	61-70 years	Total
1	56	Female							1		1	no	1	Female
2	32	Female	1				2				3	no	2	Female
3	55	Female						2			2	no	2	Female
4	36	Female	1	1			2				4	no	2	Female
5	33	Female	2				2				4	yes	3	Female
6	50	Female			2			1	1		4	yes	2	both
7	55	Female			1				1	1	3	no	3	Female
8	34	Female					2				2	yes	3	both
9	38	Female					2				2	no	2	Female
10	42	Male		2				2			4	no	2	Male
11	44	Female		2				2			4	yes	1	Female
12	69	Female							2		2	yes	2	Female
13	50	Female			2			1			3	no	1	Female
14	39	Female		2			2				4	no	2	Female
15	32	Male	2				3				5	no	1	Male
16	32	Female	1				3				4	no	2	Female
17	56	Female				1				2	3	no	2	Female
18	34	Male	2				3				5	no	1	Male
19	58	Female					2	2			4	no	2	Female
20	68	Female							2		2	no	2	-

## Sheet: Survey to visitors
SURVEY TO PARK'S VISITORS
#	Age	Gender	Origin	How many days a week do you visit the park?	Who do you visit the park with?	Why do you visit the park?				Do you visit the shop and the cafeteria?	Do you use the public orchard?	Do you know there is a henhouse?	Do you know that urban waste is managed in the henhouse?	How would you rate?			Do you like to beanimals in the park?	Advantages of CH	Disadvantages of CH	Would you like to participate in Ch project?	Do you recycle at home?	Do you know how to recycle organic waste?	Do you recycle organic waste?	From whom do you receive information about recycling?
						Leisure	Sport	Work	Cafeteria					Orchard	Henhouse	Park								Municipality	Association of Municipalities for Waste Management	Companies	Internet	Family	Friends	Courses	Other
1	46	Male	Noáin	30	Family	1				yes	no	yes	yes	8	8	10	yes	The contact with people and kids	It needs more cleaning	yes	yes	no	no	1	1
2	38	Female	Noáin	30	Family	1				yes	no	yes	no	8	8	10	yes	It's entertaining for children		yes	no	no	no	1	1
3	36	Female	Noáin	30	Family	1				yes	no	yes	no	10	10	10	yes	Educational value. The eggs are healthier		yes	yes	no	no	1	1
4	53	Male	Noáin	30	Alone	1				yes	no	yes	no	5	5	5	no	Eggs. Using orchard residues	It is the most disgusting and very unintelligent animal	no	yes	yes	no	1						1	it's a matter of mentality /conscience
5	24	Male	Noáin	20	Alone	1				no	no	no	no	5	5	7	yes	Eggs	Smell and dirt	no	yes	no	no
6	47	Male	Other	30	Alone			1		yes	yes	yes	yes	10	10	10	yes	Childhood revival. Showing the origin of the food to the people. Recycling	Nothing	yes	yes	yes	no	1	1	1	1	1	1	1	The park / University
7	24	Male	Other	5	Partner	1				no	no	yes	yes	8	9	8	no	Promoting recycling. Attracting attention of children	Nothing	yes	yes	yes	yes				1	1
8	37	Female	Other	1	Partner	1				no	no	yes	yes	10	10	10	yes	Eggs production		yes	yes	no	no								Information on the garbage containers
9	63	Male	Noáin	10	Partner	1				no	no	yes	yes	6	5	10	yes	It's good for children	Losses. It's expensive. Hens only lay eggs with a lot of feed.	no	yes	yes	no		1			1			The park
10	63	Female	Noáin	10	Partner/ Friends/ Grandchildren	1				no	no	yes	yes	7	5	10	yes	It's good for children	Losses. I have had chickens for 60 years.	no	yes	yes	no		1			1			The park
11	36	Male	Other	1	Partner/ Friends	1				no	no	yes	no	8	10	8	yes	Waste management. Eggs. It's sustainable		yes	yes	yes	no		1
12	35	Female	Other	1	Partner/ Friends	1				no	no	yes	no	7	10	8	yes	It's a barter	-	yes	yes	yes	no		1
13	34	Male	Other	1	Friends	1				no	no	yes	no	8	10	8	yes	Waste management	Batteries or plastic can be thrown into compost unintentionally	yes	yes	yes	yes		1				1
14	39	Female	Noáin	15	Partner/ Children/ Friends	1			1	yes	yes	yes	yes	10	10	10	yes	Composting. Eggs. Children entertainment		yes	yes	yes	no				1				The park
15	42	Female	Other	1	Partner/ Children				1	yes	yes	yes	yes	10	-	9	yes	Persuading people to recycle and separate waste. For children	Smell	yes	yes	yes	no		1
16	36	Male	Other	1	Partner	1				no	no	yes	no	8	6	9	yes	Barter eggs for waste		yes	yes	yes	no	1						1
17	42	Female	Noáin	1	Partner	1				no	no	yes	no	8	7	9	yes	The children go for eggs		yes	yes	no	no	1
18	56	Female	Noáin	25	Alone/ Friends	1	1		1	yes	yes	yes	yes	8.5	9	9	yes	Recycling, composting		yes	yes	no	no
19	56	Female	Noáin	25	Alone/ Friends/ Partner/ Children	1			1	yes	no	yes	yes	8	8	9	yes	It's funny	Waiting list, ¿Possible diseases?	yes	yes	no	no
20	24	Female	Pamplona	4	Friends	1				yes	no	yes	yes	8	9	9	yes	Recycling. Eggs	Dirt	yes	yes	yes	no			1	1	1	1	1
21	24	Male	Pamplona	4	Friends	1				yes	no	yes	yes	9	8	8	yes	Eggs	Dirt	no	yes	no	no						1
22	59	Female	Pamplona	1	Family	1				no	no	yes	yes	10	8	9	yes	Eggs. Compost production	Dirt	yes	yes	no	no					1	1	1
23	81	Male	Noáin	8	Friends	1				no	no	yes	no	10	8	9	yes	Eggs, for children	Smell and dirt	no	no	no	no					1
24	65	Male	Noáin	16	Family	1				no	no	yes	yes	8	8	8	yes	Eggs , recycling		no	yes	no	no		1		1	1	1
25	10	Male	Noáin	8	Family	1				no	no	yes	no	7	10	10	yes	Eggs		yes	yes	yes	no				1	1	1		At school
